# Supplementary material for: Push–pull ruthenium diacetylide complexes: new dyes for p-type dye-sensitized solar cells
Source: Royal Society of Chemistry journal article supplement (doi:10.1039/c5ra25899e), 2016-01-01
Supplement: c5ra25899e1.pdf [file c5ra25899e1.pdf]

## Electronic Supplementary Information

### **Push-pull ruthenium diacetylide complexes: new dyes for p-type dye-sensitized solar cells.**

Siliu Lyu,<sup>a</sup> Yoann Farré,<sup>b</sup> Laurent Ducasse,<sup>a</sup> Yann Pellegrin,<sup>b</sup> Thierry Toupance,<sup>a</sup> Céline Olivier\*<sup>a</sup> and Fabrice Odobel\*<sup>b</sup>

#### Table of Content

**Figure S1.** Schematic view of energy diagram and working principle of the p-type DSC.

**Figure S2.** Normalized electronic absorption and emission spectra of **SL1** and **SL2** in CH<sub>2</sub>Cl<sub>2</sub>.

**Figure S3.** Cyclic voltammograms of **SL1** and **SL2** recorded in THF/nBu<sub>4</sub>NPF<sub>6</sub> (0.1M) vs. Fc/Fc<sup>+</sup> at 200 mV s<sup>-1</sup>.

**Figure S4.** TD-DFT simulated absorption spectra of **SL1** and **SL2**.

<sup>31</sup>P, <sup>1</sup>H, <sup>13</sup>C NMR and HR-MS spectra of **SL1** and **SL2**

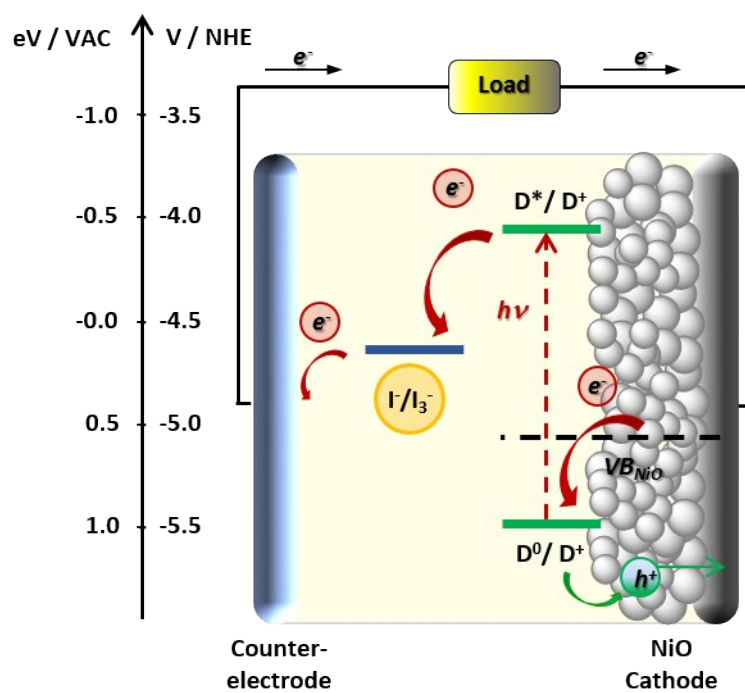

**Figure S1.** Schematic view of energy diagram and working principle of the p-type DSC.

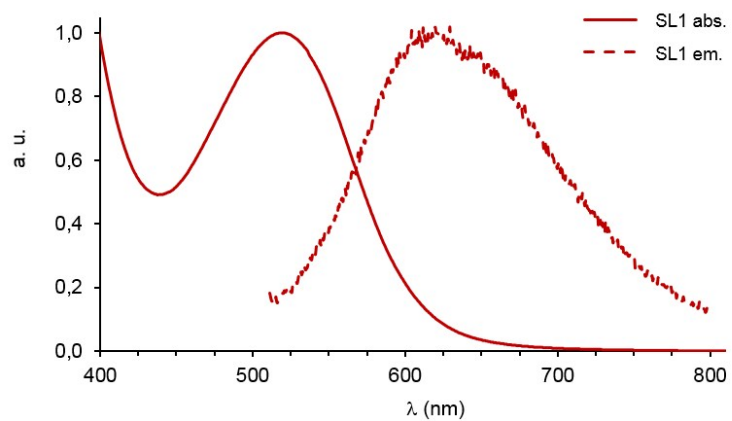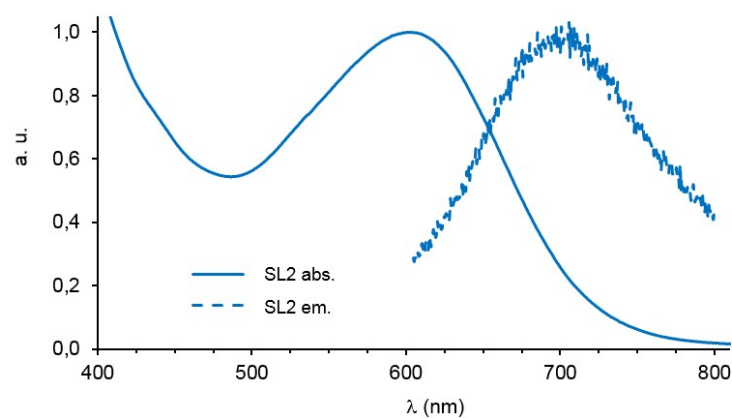

**Figure S2.** Normalized electronic absorption (plain) and fluorescence emission (dashed) spectra of **SL1** and **SL2** in  $\text{CH}_2\text{Cl}_2$ .

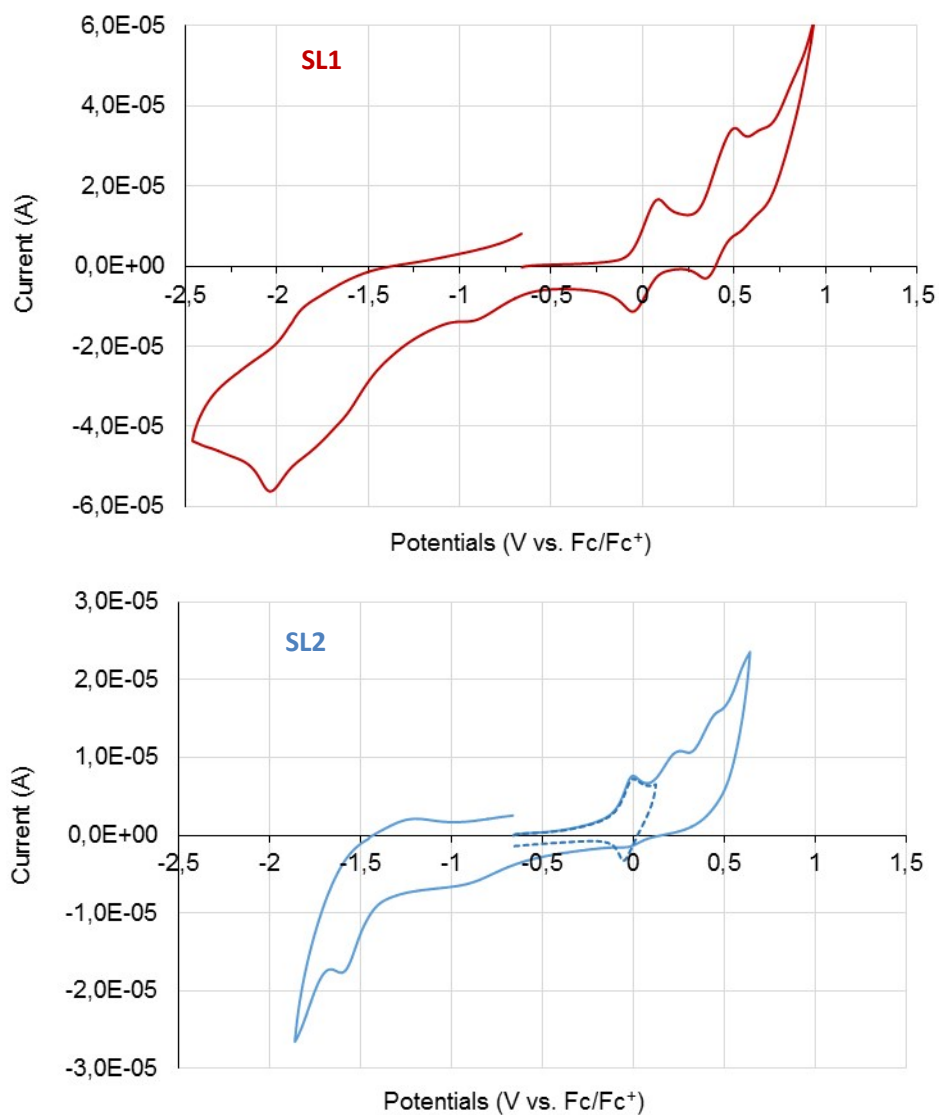

**Figure S3.** Cyclic voltammograms of **SL1** and **SL2** recorded in THF/ $n\text{Bu}_4\text{NPF}_6$  (0.1M) vs. Fc/Fc+ at 200 mV s<sup>-1</sup>. The blue dotted line represents the reversibility of the first oxidation process isolated; the second oxidation process is only partly reversible.

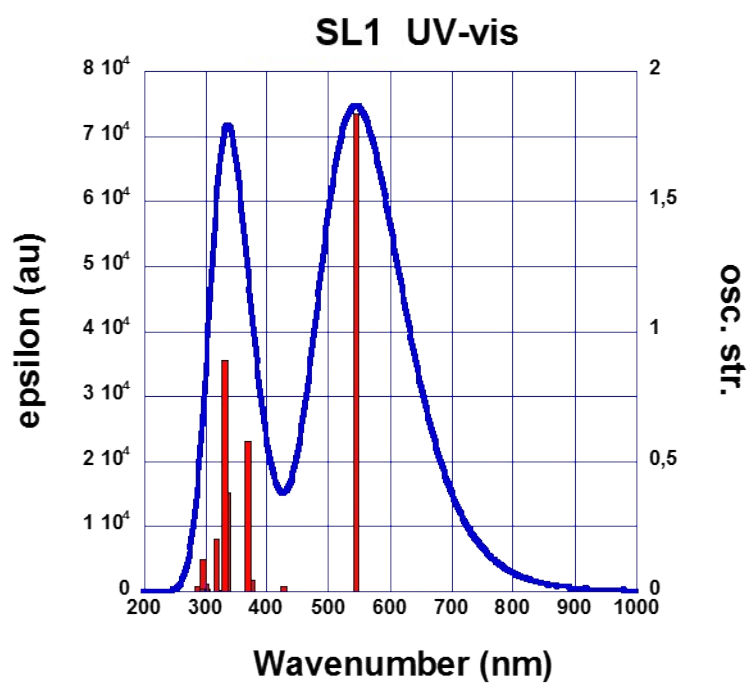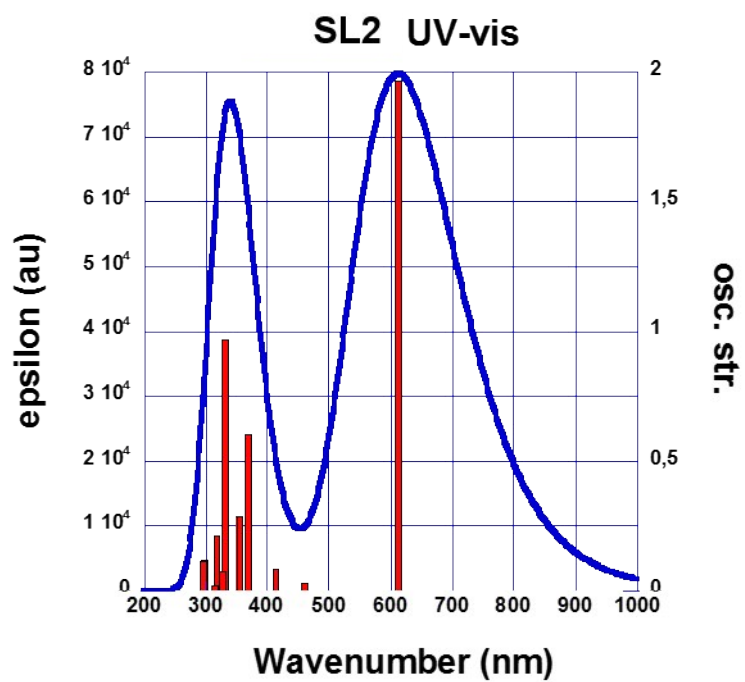

**Figure S4.** TD-DFT simulated absorption spectra of **SL1** and **SL2**. Absorption bands enlarged using Gaussian functions with full-width at half-height (FWHH) of 5 nm to reproduce the experimental spectra.

<sup>31</sup>P, <sup>1</sup>H, <sup>13</sup>C NMR and HR-MS spectra of **SL1** and **SL2**

(\* correspond to signals of solvent residuals)

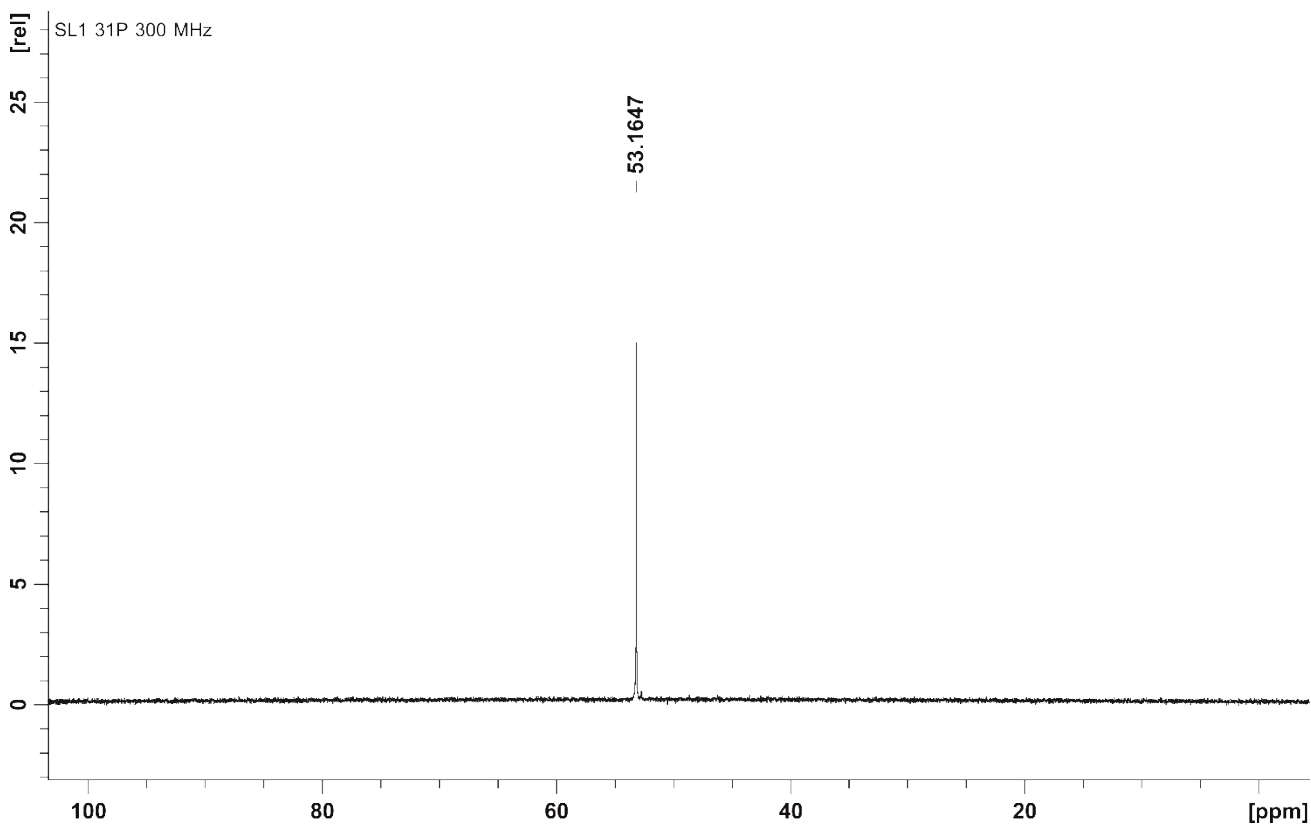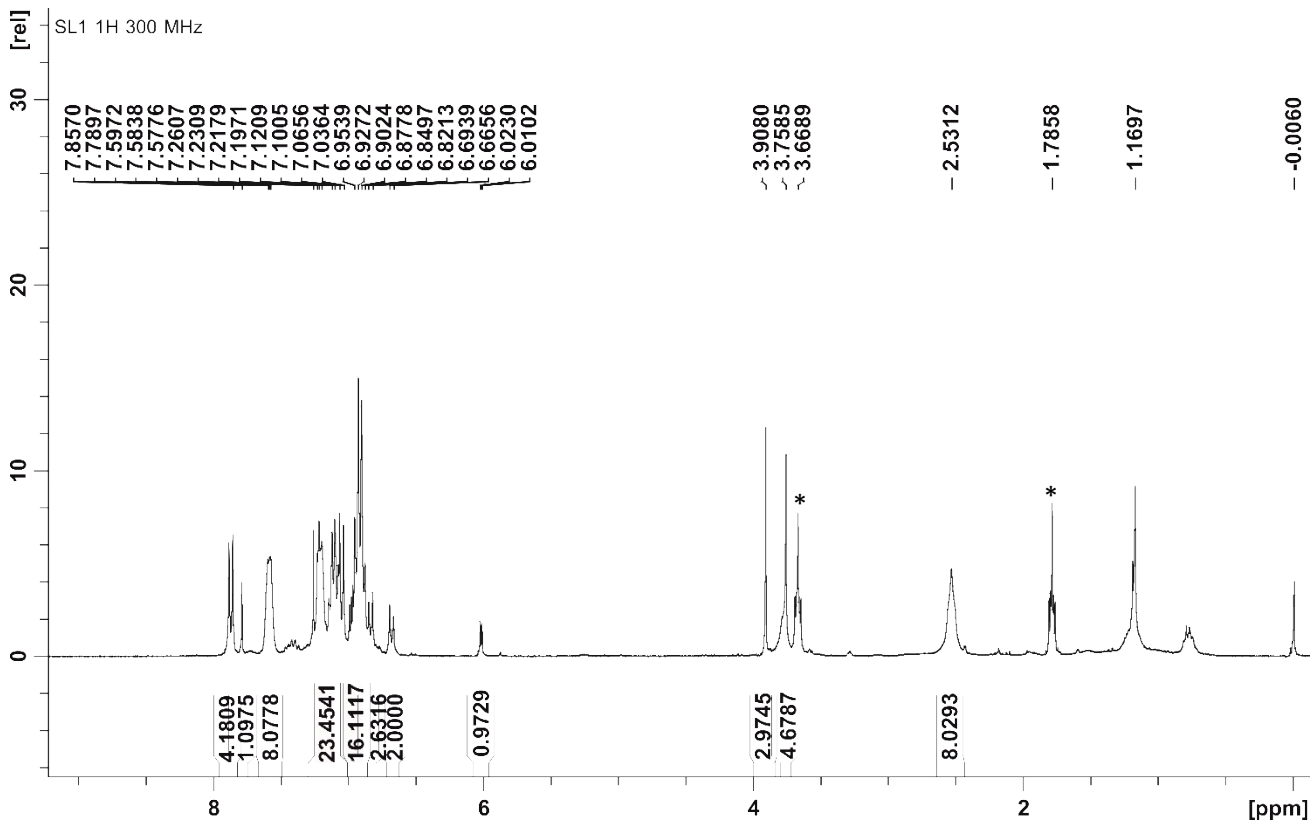

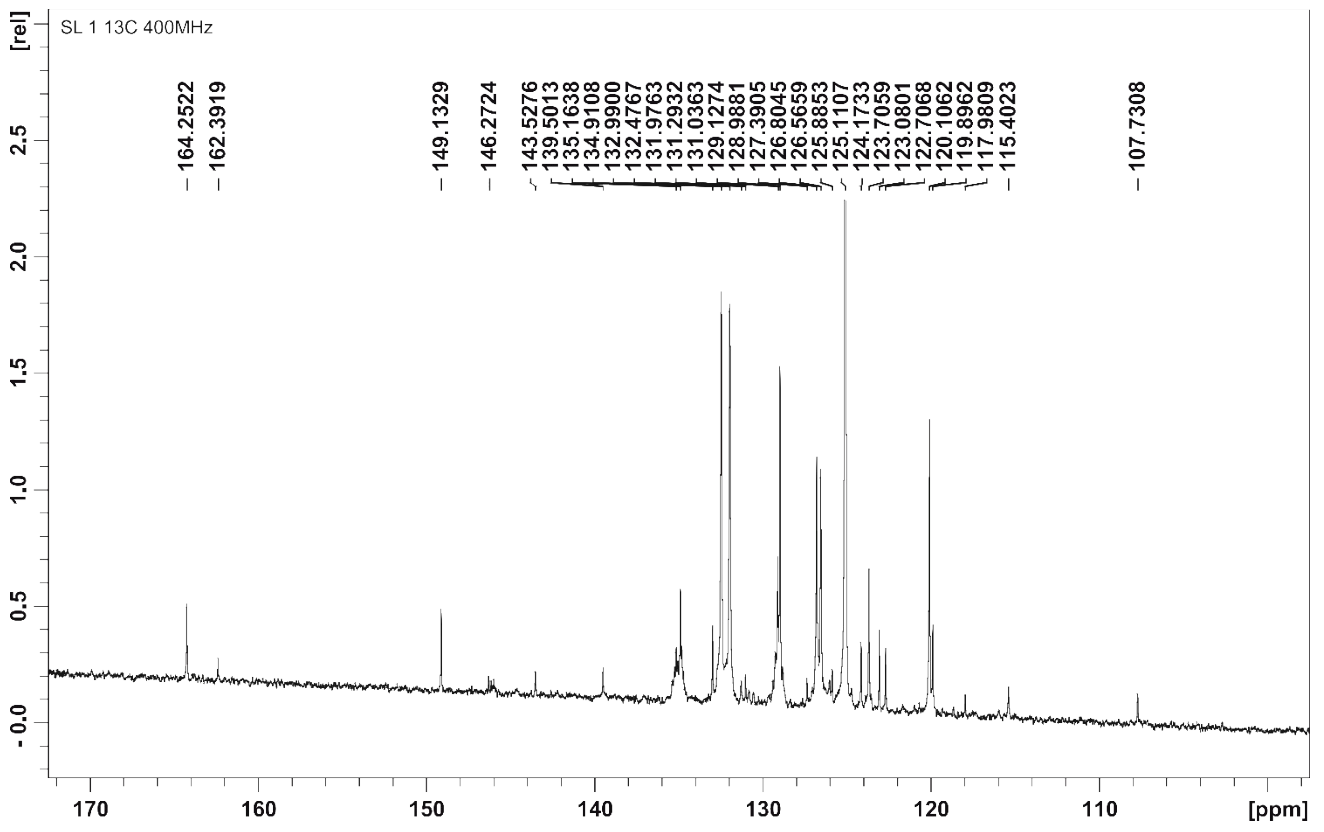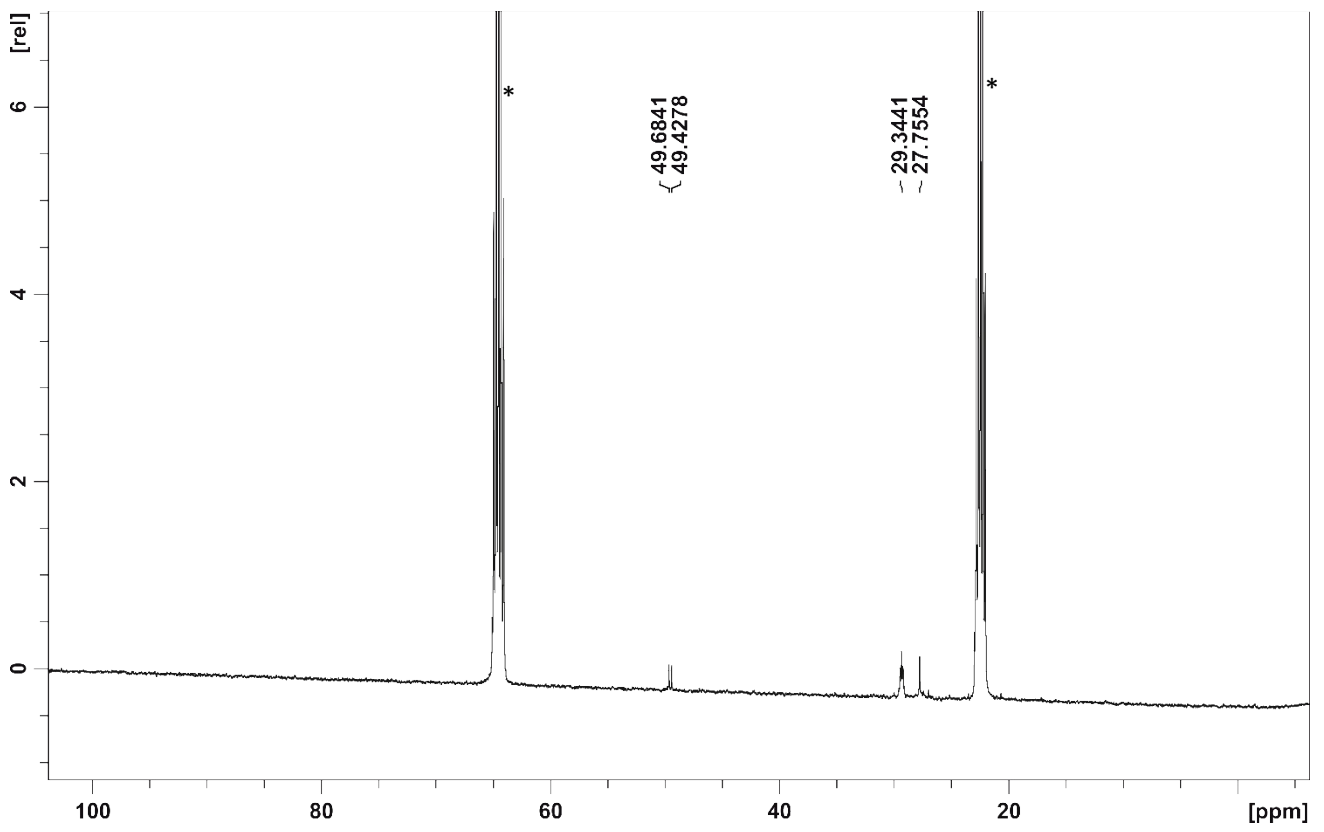

Acq. Data Name: FD-04-05-15-SL1  
 Creation Parameters: Average(MS[1] Time:0.69..0.76)  
 x10<sup>3</sup> Intensity (101643)

Experiment Date/Time: 5/4/2015 5:06:45 PM  
 Ionization Mode: FD+(eiFi)

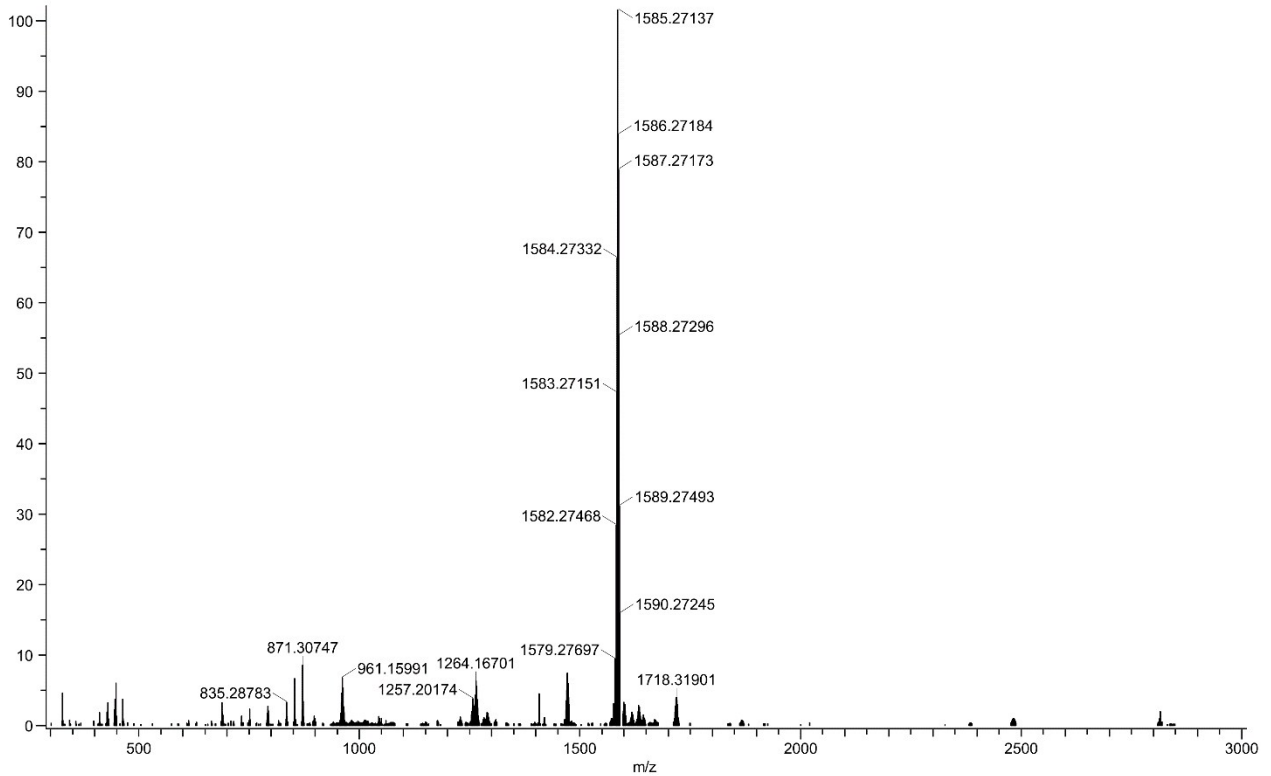

Data:FD-04-05-15-SL1  
 Sample Name:  
 Description:  
 Ionization Mode:FD+(eiFi)  
 History:Determine m/z[Peak Detect[Centroid,30,Area];Smooth[23]];Correct Base[];Average(MS[1] 0.69..0.76)

Acquired:5/4/2015 5:06:45 PM  
 Operator:AccuTof  
 Mass Calibration data:FD-141114-PEG1000  
 Created:5/4/2015 5:23:18 PM  
 Created by:AccuTof

Charge number:1 Tolerance:5.00(ppm)  
 Element:<sup>12</sup>C:0 .. 200, <sup>1</sup>H:0 .. 200, <sup>14</sup>N:1 .. 1, <sup>16</sup>O:8 .. 8, <sup>31</sup>P:4 .. 4, <sup>96</sup>Ru:1 .. 1, <sup>32</sup>S:2 .. 2

Unsaturation Number:-20.0 .. 100.0 (Fraction:Both)

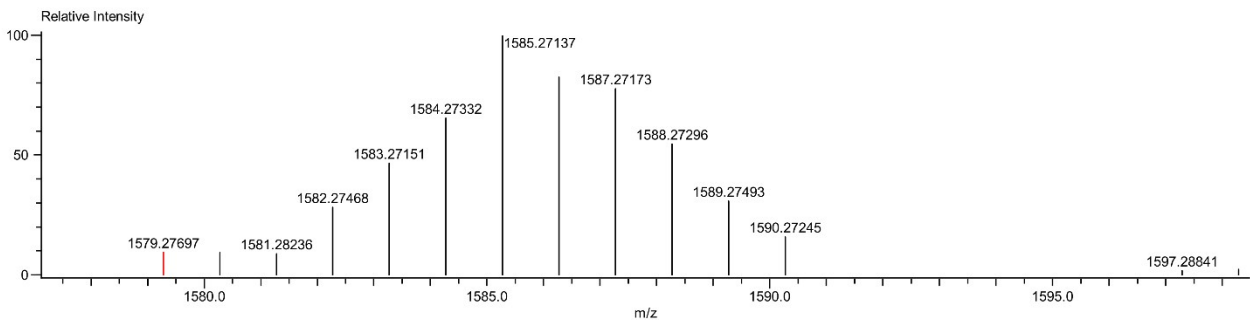

| Mass       | Intensity | Relative Intensity | Calc. Mass | Mass Difference (mmu) | Mass Difference (ppm) | Possible Formula                                                                                                                                                                                             | Unsaturation Number |
|------------|-----------|--------------------|------------|-----------------------|-----------------------|--------------------------------------------------------------------------------------------------------------------------------------------------------------------------------------------------------------|---------------------|
| 1579.27697 | 9354.72   | 9.20               | 1579.28041 | -3.44                 | -2.18                 | <sup>12</sup> C <sub>90</sub> <sup>1</sup> H <sub>73</sub> <sup>14</sup> N <sub>1</sub> <sup>16</sup> O <sub>8</sub> <sup>31</sup> P <sub>4</sub> <sup>96</sup> Ru <sub>1</sub> <sup>32</sup> S <sub>2</sub> | 63.5                |



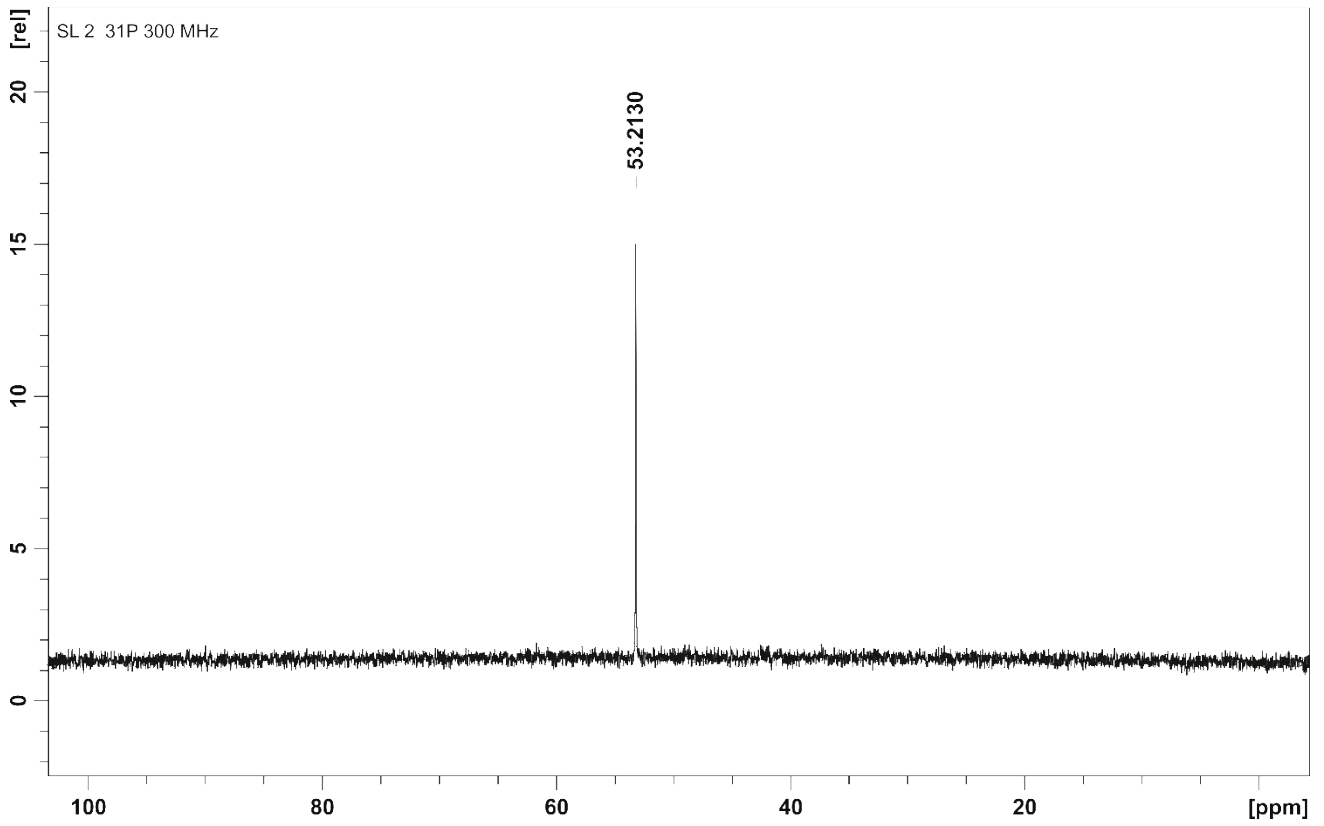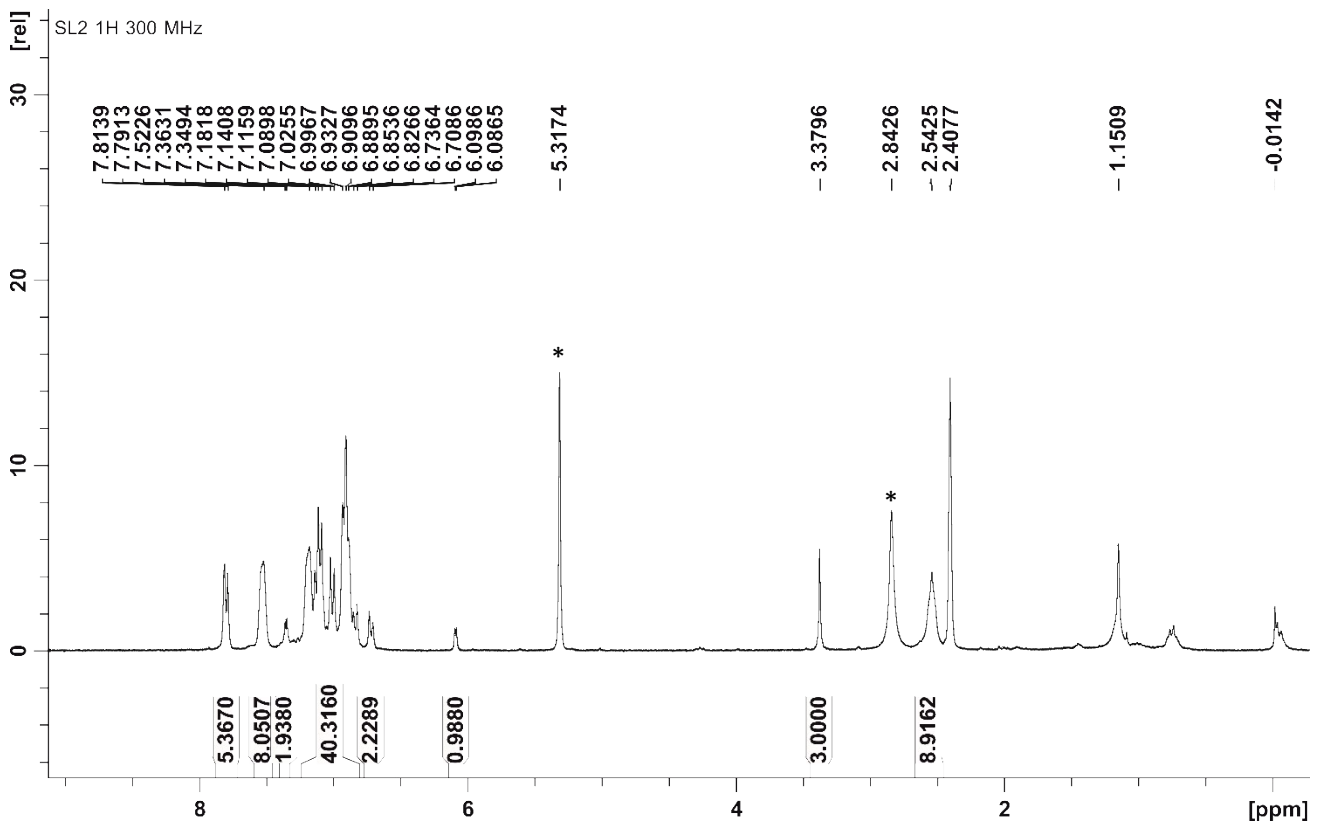

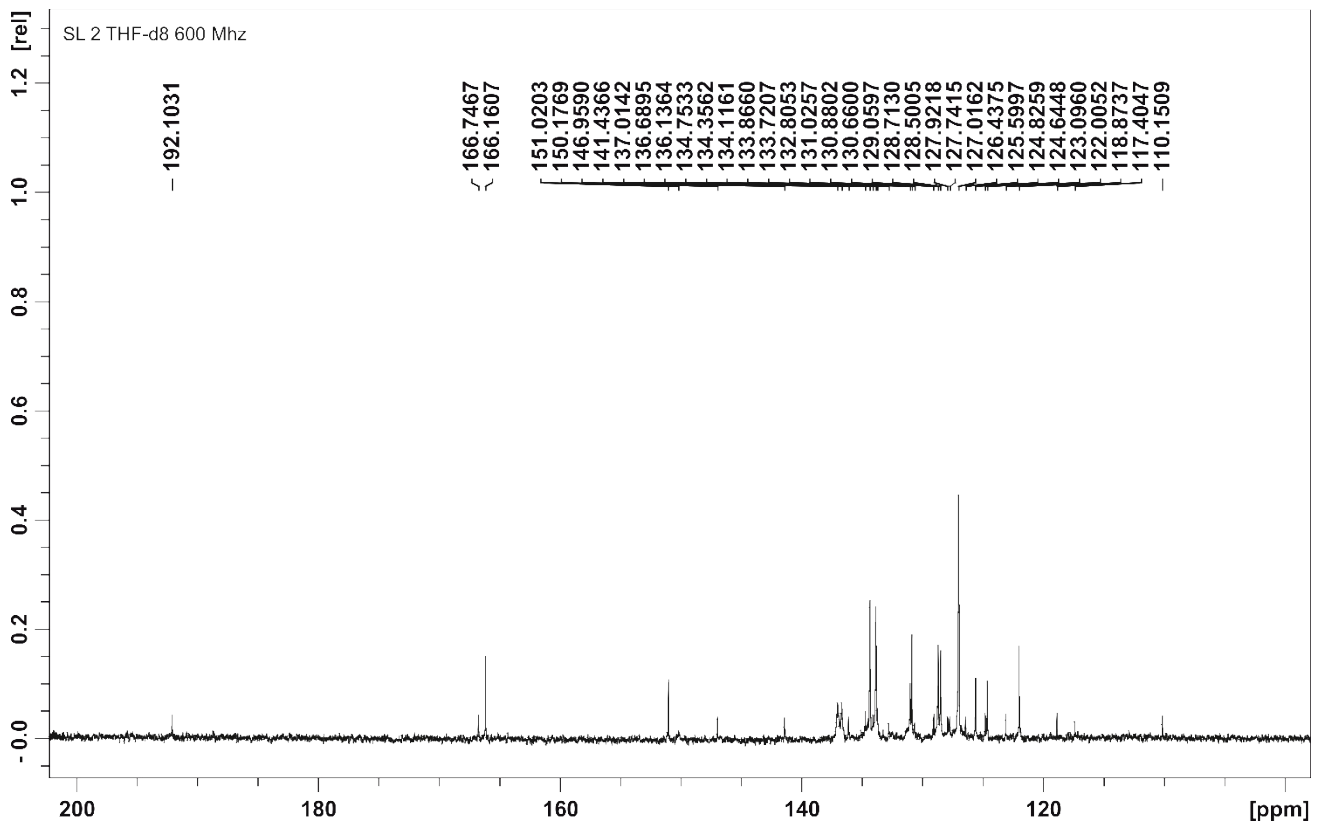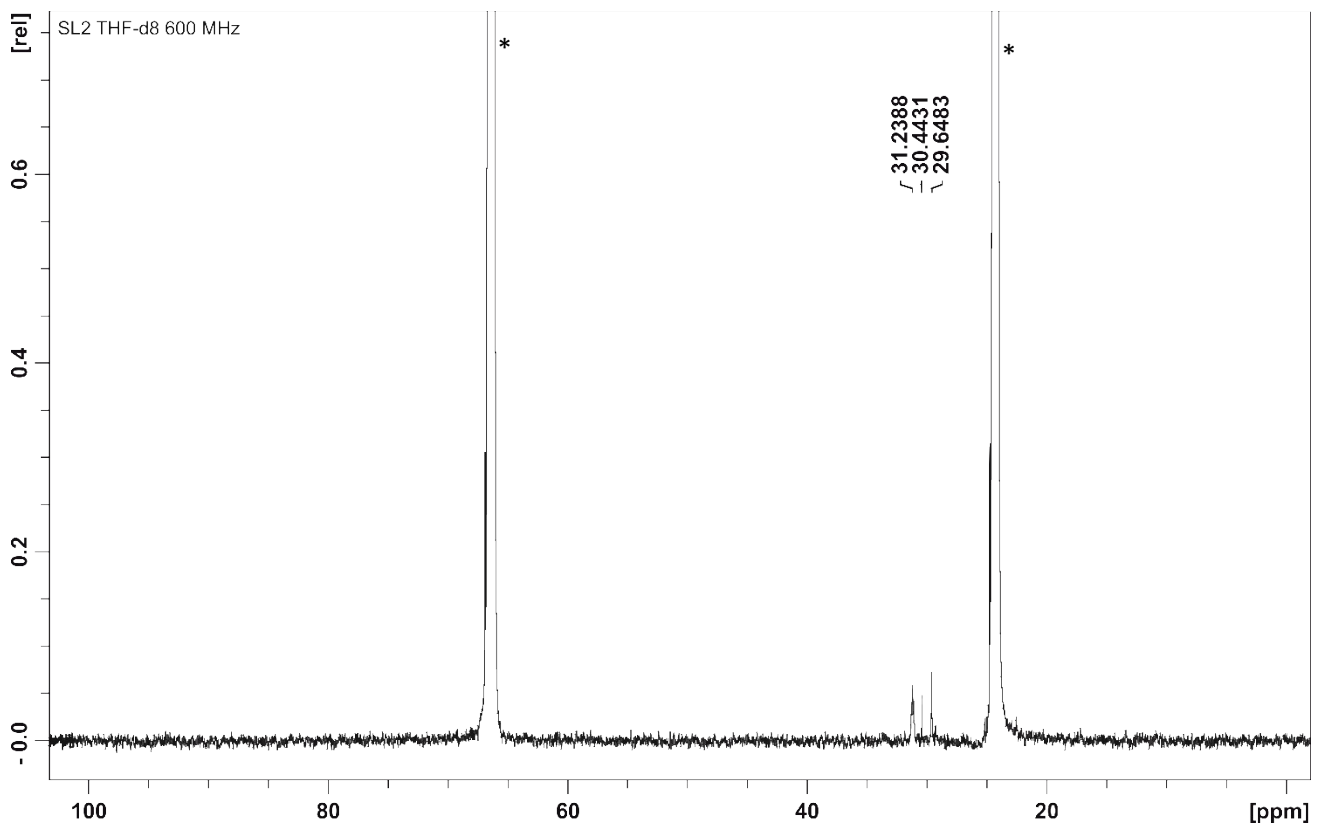

Acq. Data Name: FD-05-05-15-SL2  
 Creation Parameters: Average(MS[1] Time:0.68..0.69)

Experiment Date/Time: 5/5/2015 11:04:14 AM  
 Ionization Mode: FD+(eIFi)

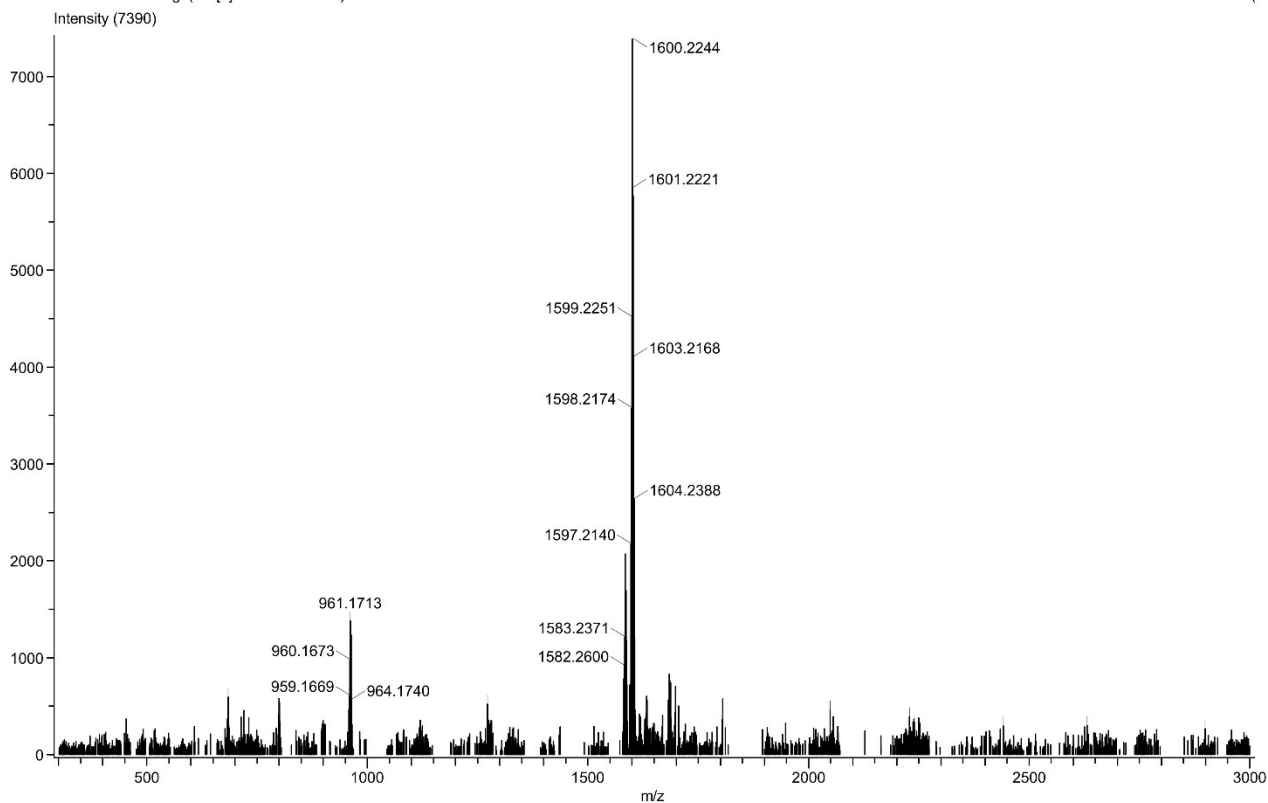

Data:FD-05-05-15-SL2  
 Sample Name:  
 Description:  
 Ionization Mode:FD+(eIFi)  
 History:Determine m/z[Peak Detect[Centroid,30,Area];Smooth[9]];Correct Base[];Average(MS[1] 0.68..0.69)

Acquired:5/5/2015 11:04:14 AM  
 Operator:AccuTof  
 Mass Calibration data:FD-141114-PEG1000  
 Created:5/5/2015 11:19:46 AM  
 Created by:AccuTof

Charge number:1  
 Tolerance:5.00(ppm)  
 Element:<sup>12</sup>C:0 .. 200, <sup>1</sup>H:0 .. 200, <sup>14</sup>N:2 .. 2, <sup>16</sup>O:5 .. 5, <sup>31</sup>P:4 .. 4, <sup>96</sup>Ru:1 .. 1, <sup>32</sup>S:4 .. 4

Unsaturation Number:-20.0 .. 100.0 (Fraction:Both)

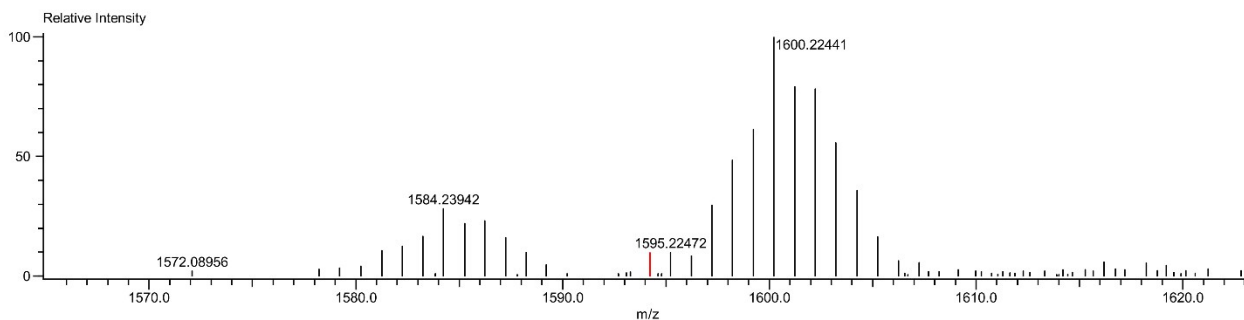

| Mass       | Intensity | Relative Intensity | Calc. Mass | Mass Difference (mmu) | Mass Difference (ppm) | Possible Formula                                                                                                                                                                                             | Unsaturation Number |
|------------|-----------|--------------------|------------|-----------------------|-----------------------|--------------------------------------------------------------------------------------------------------------------------------------------------------------------------------------------------------------|---------------------|
| 1594.22185 | 704.37    | 9.53               | 1594.21940 | 2.45                  | 1.53                  | <sup>12</sup> C <sub>89</sub> <sup>1</sup> H <sub>70</sub> <sup>14</sup> N <sub>2</sub> <sup>16</sup> O <sub>5</sub> <sup>31</sup> P <sub>4</sub> <sup>96</sup> Ru <sub>1</sub> <sup>32</sup> S <sub>4</sub> | 66.5                |
